# Supplementary material for: Quantitative Analysis of Cenobamate and Concomitant Anti-Seizure Medications in Human Plasma via Ultra-High Performance Liquid Chromatography–Tandem Mass Spectrometry
Source: MDPI journal article supplement (doi:10.3390/molecules29040884), 2024-02-17
Supplement: s1 [file s1]

## Supplementary Material

**Table S1.** Nominal concentrations of calibration curves and quality control (QC) samples. Concentrations are expressed in mg/L, except for TGB (ng/mL). Compounds are listed in order of retention time apart from CNB. CAL0 = calibrator 0, CAL1 = calibrator 1, CAL2 = calibrator 2, CAL3 = calibrator 3, CAL4 = calibrator 4, CAL5 = calibrator 5, CAL6 = calibrator 6, LLOQ = lower limit of quantification, LQC = lower QC, MQC = medium QC, HQC = high QC, CNB = cenobamate, PGB = pregabalin, GBP = gabapentin, LEV = levetiracetam, ETS = ethosuximide, LTG = lamotrigine, PRM = primidone, LCS = lacosamide, ZNS = zonisamide, RUF = rufinamide, MHD = 10-monohydroxy carbamazepine, BRV = brivaracetam, CBZ-EP = carbamazepine-epoxide, TPM = topiramate, TGB = tiagabine, PMP = perampanel, STP = stiripentol.

| Compound | CAL0 | LLOQ | CAL1 | CAL2 | CAL3  | CAL4  | CAL5  | CAL6   | LQC  | MQC   | HQC   |
|----------|------|------|------|------|-------|-------|-------|--------|------|-------|-------|
| CNB      | 0.00 | 0.80 | 2.40 | 5.00 | 10.00 | 20.00 | 40.00 | 80.00  | 3.00 | 30.00 | 60.00 |
| PGB      | 0.00 | 0.01 | 0.04 | 0.08 | 0.16  | 0.33  | 0.65  | 1.30   | 0.04 | 0.04  | 0.08  |
| GBP      | 0.00 | 0.19 | 0.56 | 1.17 | 2.34  | 4.68  | 9.35  | 18.70  | 0.61 | 6.10  | 12.20 |
| LEV      | 0.00 | 0.5  | 1.50 | 3.13 | 6.26  | 12.53 | 25.05 | 50.10  | 1.53 | 15.30 | 30.60 |
| ETS      | 0.00 | 1.10 | 3.29 | 6.84 | 13.69 | 27.38 | 54.75 | 109.50 | 3.41 | 34.05 | 68.10 |
| LTG      | 0.00 | 0.20 | 0.59 | 1.23 | 2.45  | 4.90  | 9.80  | 19.60  | 0.61 | 6.10  | 12.20 |
| PRM      | 0.00 | 0.25 | 0.76 | 1.58 | 3.16  | 6.33  | 12.65 | 25.30  | 0.82 | 8.20  | 16.40 |
| LCS      | 0.00 | 0.19 | 0.58 | 1.21 | 2.43  | 4.85  | 9.70  | 19.40  | 0.61 | 6.10  | 12.20 |
| ZNS      | 0.00 | 0.38 | 1.15 | 2.40 | 4.80  | 9.60  | 19.20 | 38.40  | 1.20 | 12.00 | 24.00 |
| RUF      | 0.00 | 0.46 | 1.38 | 2.88 | 5.76  | 11.53 | 23.05 | 46.10  | 1.45 | 14.50 | 29.00 |
| MHD      | 0.00 | 0.51 | 1.52 | 3.18 | 6.35  | 12.70 | 25.40 | 50.80  | 1.58 | 15.80 | 31.60 |
| BRV      | 0.00 | 0.06 | 0.19 | 0.39 | 7.90  | 1.58  | 3.15  | 6.30   | 0.22 | 2.20  | 4.40  |
| CBZ-EP   | 0.00 | 0.08 | 0.23 | 0.48 | 0.96  | 1.93  | 3.85  | 7.70   | 0.25 | 2.45  | 4.90  |
| TPM      | 0.00 | 0.28 | 0.83 | 1.73 | 3.46  | 6.93  | 13.85 | 27.70  | 0.90 | 9.00  | 18.00 |
| TGB      | 0.00 | 0.40 | 1.20 | 2.50 | 5.00  | 10.00 | 20.10 | 40.10  | 1.30 | 13.00 | 26.00 |
| PMP      | 0.00 | 0.03 | 0.08 | 0.16 | 0.33  | 0.65  | 1.30  | 2.60   | 0.08 | 0.75  | 1.50  |
| STP      | 0.00 | 0.28 | 0.85 | 1.76 | 3.53  | 7.05  | 14.10 | 28.20  | 0.87 | 8.65  | 17.30 |

**Table S2.** Intra-day precision and accuracy of the quantification method in human plasma for the detection of the other detected ASMs. LLOQ = lower limit of quantification, LQC = lower QC, MQC = medium QC, HQC = high QC, CNB = cenobamate, PGB = pregabalin, GBP = gabapentin, LEV = levetiracetam, ETS = ethosuximide, LTG = lamotrigine, PRM = primidone, LCS = lacosamide, ZNS = zonisamide, RUF = rufinamide, MHD = 10-monohydroxy carbamazepine, BRV = brivaracetam, CBZ-EP = carbamazepine-epoxide, TPM = topiramate, TGB = tiagabine, PMP = perampanel, STP = stiripentol.

|      |       | PGB   |      |       |       |       | GBP  |      |       |       |       | LEV  |      |       |       |      |
|------|-------|-------|------|-------|-------|-------|------|------|-------|-------|-------|------|------|-------|-------|------|
|      |       | Day1  | Day2 | Day3  | Day4  | Day5  | Day1 | Day2 | Day3  | Day4  | Day5  | Day1 | Day2 | Day3  | Day4  | Day5 |
| LLOQ | Bias% | 10.0  | 18.0 | -10.0 | 2.0   | 10.0  | 0.7  | 5.7  | -18.0 | -16.8 | -9.1  | 4.3  | 2.7  | 14.4  | -16.6 | -4.8 |
|      | CV%   | 6.4   | 9.3  | 11.1  | 8.2   | 9.1   | 3.7  | 3.7  | 8.6   | 4.2   | 3.4   | 1.3  | 7.4  | 6.4   | 6.6   | 3.9  |
| LQC  | Bias% | -11.0 | -6.0 | -2.5  | -3.0  | 1.5   | -3.4 | -7.9 | -13.7 | 8.3   | 12.3  | 11.2 | 2.4  | 4.3   | 11.8  | 14.9 |
|      | CV%   | 7.6   | 9.7  | 10.4  | 5.6   | 5.9   | 2.8  | 3.5  | 9.0   | 5.0   | 3.8   | 5.9  | 7.8  | 4.9   | 7.6   | 2.5  |
| MQC  | Bias% | 2.1   | 6.8  | 11.7  | -0.1  | -1.3  | -7.3 | -4.5 | 1.3   | -1.9  | -5.5  | 1.1  | 10.5 | 10.6  | 2.7   | 1.1  |
|      | CV%   | 5.3   | 3.1  | 8.2   | 5.2   | 4.1   | 4.6  | 3.5  | 5.1   | 3.1   | 2.9   | 2.2  | 3.5  | 3.7   | 2.8   | 4.7  |
| HQC  | Bias% | 0.6   | 4.4  | 8.5   | 1.5   | 0.2   | -7.3 | -7.8 | -1.3  | -6.2  | -9.9  | 2.9  | 10.0 | 8.8   | -1.9  | -4.0 |
|      | CV%   | 3.1   | 2.0  | 2.4   | 1.3   | 3.4   | 3.2  | 2.6  | 3.9   | 2.1   | 2.8   | 4.5  | 3.7  | 6.2   | 4.4   | 2.6  |
|      |       | ETS   |      |       |       |       | LTG  |      |       |       |       | PRM  |      |       |       |      |
|      |       | Day1  | Day2 | Day3  | Day4  | Day5  | Day1 | Day2 | Day3  | Day4  | Day5  | Day1 | Day2 | Day3  | Day4  | Day5 |
| LLOQ | Bias% | 1.4   | 10.6 | -10.7 | -11.2 | -10.2 | 8.2  | 2.6  | -18.3 | -15.1 | -3.1  | 6.8  | -6.1 | -13.0 | -12.1 | 11.5 |
|      | CV%   | 2.7   | 12.3 | 8.4   | 6.4   | 10.3  | 8.2  | 11.3 | 4.7   | 7.6   | 2.6   | 11.6 | 12.9 | 11.3  | 4.3   | 3.1  |
| LQC  | Bias% | 1.6   | 1.2  | 4.3   | 3.6   | 5.2   | -1.3 | -5.2 | 5.3   | 13.1  | 9.7   | -2.6 | -5.9 | 5.0   | 8.1   | 11.1 |
|      | CV%   | 4.6   | 3.3  | 9.0   | 6.5   | 6.7   | 4.5  | 2.2  | 4.5   | 6.1   | 5.6   | 10.3 | 5.0  | 7.6   | 6.4   | 11.5 |
| MQC  | Bias% | -5.6  | 1.7  | -1.0  | -8.2  | 0.2   | -5.2 | 2.3  | 2.8   | 3.0   | -4.6  | -8.0 | -9.3 | -2.9  | -9.1  | -3.3 |
|      | CV%   | 7.2   | 4.2  | 4.7   | 6.2   | 3.0   | 2.4  | 5.4  | 9.4   | 4.5   | 3.6   | 4.8  | 6.9  | 9.0   | 4.6   | 4.5  |
| HQC  | Bias% | -3.9  | -2.0 | 1.4   | -9.7  | -9.3  | -5.9 | -3.7 | 0.3   | -1.2  | -5.6  | -7.4 | -7.5 | -8.2  | -9.3  | -2.3 |
|      | CV%   | 2.6   | 3.3  | 8.0   | 3.2   | 3.5   | 2.4  | 2.9  | 5.0   | 4.4   | 3.0   | 2.9  | 3.7  | 4.1   | 8.0   | 5.5  |
|      |       | LCS   |      |       |       |       | ZNS  |      |       |       |       | RUF  |      |       |       |      |
|      |       | Day1  | Day2 | Day3  | Day4  | Day5  | Day1 | Day2 | Day3  | Day4  | Day5  | Day1 | Day2 | Day3  | Day4  | Day5 |
| LLOQ | Bias% | 13.7  | 14.2 | -6.3  | -9.6  | -16.8 | -5.8 | 5.2  | -6.5  | -18.3 | -18.7 | 10.8 | 10.5 | -4.1  | -14.8 | 4.8  |
|      | CV%   | 8.1   | 6.2  | 8.0   | 4.6   | 6.8   | 4.2  | 4.0  | 6.3   | 7.2   | 2.2   | 8.8  | 3.2  | 4.4   | 5.5   | 2.3  |
| LQC  | Bias% | -1.7  | -6.2 | 1.2   | 9.4   | 7.8   | -4.3 | -6.0 | 3.9   | 4.9   | 10.3  | 12.6 | 4.8  | 7.8   | 13.3  | 11.8 |
|      | CV%   | 6.4   | 2.9  | 6.9   | 8.0   | 3.1   | 0.8  | 3.7  | 5.3   | 5.3   | 6.6   | 7.3  | 4.0  | 6.7   | 7.5   | 3.0  |
| MQC  | Bias% | -7.0  | -1.3 | -4.3  | -2.9  | 1.9   | -4.0 | -3.7 | -0.8  | -2.5  | 2.7   | 5.4  | 4.6  | 2.1   | -0.3  | 0.6  |
|      | CV%   | 4.5   | 1.6  | 7.0   | 2.7   | 5.3   | 4.6  | 5.0  | 6.7   | 4.9   | 3.2   | 4.8  | 1.9  | 5.9   | 5.0   | 6.9  |
| HQC  | Bias% | -3.1  | -1.5 | -6.3  | -4.3  | -2.5  | -3.0 | -2.2 | -2.4  | -5.2  | -1.9  | 9.7  | 3.4  | 0.1   | -5.5  | -3.7 |
|      | CV%   | 1.5   | 2.7  | 5.6   | 3.2   | 5.0   | 5.7  | 3.2  | 3.0   | 6.0   | 3.7   | 4.0  | 3.4  | 7.3   | 5.3   | 3.7  |

|      |       | MHD  |       |       |       |       | BRV   |       |       |       |       | CBZ-EP |       |       |       |       |
|------|-------|------|-------|-------|-------|-------|-------|-------|-------|-------|-------|--------|-------|-------|-------|-------|
|      |       | Day1 | Day2  | Day3  | Day4  | Day5  | Day1  | Day2  | Day3  | Day4  | Day5  | Day1   | Day2  | Day3  | Day4  | Day5  |
| LLOQ | Bias% | -2.9 | -2.5  | -4.4  | -1.3  | -9.6  | 15.4  | 18.1  | -1.0  | -10.2 | -19.3 | -10.0  | -7.0  | -0.5  | -12.5 | -9.5  |
|      | CV%   | 1.4  | 10.7  | 6.1   | 3.7   | 4.9   | 14.6  | 9.7   | 9.2   | 11.1  | 7.9   | 4.6    | 11.7  | 6.5   | 5.9   | 8.1   |
| LQC  | Bias% | -4.4 | -14.1 | 1.8   | 11.9  | 5.5   | 1.0   | -13.3 | -4.8  | -0.2  | -3.3  | -9.8   | -10.2 | 4.3   | 2.9   | 6.7   |
|      | CV%   | 5.9  | 6.5   | 4.0   | 10.8  | 2.8   | 4.3   | 6.4   | 10.6  | 3.1   | 5.5   | 9.0    | 7.7   | 7.7   | 7.8   | 5.5   |
| MQC  | Bias% | -2.0 | -0.9  | 0.6   | 1.3   | -0.1  | -13.0 | -9.1  | -8.7  | -12.1 | -6.0  | -11.5  | 2.1   | -8.0  | -0.2  | 0.7   |
|      | CV%   | 7.3  | 2.1   | 4.7   | 4.4   | 3.7   | 2.1   | 3.7   | 3.8   | 2.5   | 7.3   | 8.5    | 5.4   | 4.7   | 6.7   | 8.6   |
| HQC  | Bias% | -4.7 | -2.8  | 2.3   | -1.8  | -4.2  | -12.1 | -11.2 | -7.7  | -12.5 | -7.1  | -11.4  | -4.2  | -10.1 | -3.0  | -10.5 |
|      | CV%   | 3.4  | 3.2   | 4.4   | 4.0   | 3.1   | 1.9   | 4.1   | 9.0   | 7.0   | 3.6   | 8.8    | 2.3   | 13.9  | 5.2   | 6.4   |
|      |       | TPM  |       |       |       |       | TGB   |       |       |       |       | PMP    |       |       |       |       |
|      |       | Day1 | Day2  | Day3  | Day4  | Day5  | Day1  | Day2  | Day3  | Day4  | Day5  | Day1   | Day2  | Day3  | Day4  | Day5  |
| LLOQ | Bias% | -5.2 | -2.0  | -10.8 | -10.4 | -6.4  | 8.0   | -6.5  | -17.4 | -6.0  | -16.7 | -17.7  | -6.2  | 8.2   | -13.3 | -1.6  |
|      | CV%   | 9.5  | 3.4   | 4.9   | 11.3  | 5.0   | 3.5   | 7.2   | 4.6   | 2.0   | 3.2   | 6.0    | 7.5   | 6.4   | 3.8   | 2.2   |
| LQC  | Bias% | -2.6 | -12.2 | -1.1  | 7.2   | 11.2  | -7.0  | -7.7  | 0.5   | 1.6   | 5.5   | -3.5   | 1.5   | -8.9  | 12.8  | 2.6   |
|      | CV%   | 8.1  | 6.9   | 8.3   | 10.5  | 13.7  | 3.8   | 4.9   | 5.1   | 5.3   | 5.5   | 2.2    | 7.2   | 8.9   | 2.3   | 2.3   |
| MQC  | Bias% | -3.0 | -2.6  | -0.2  | 0.0   | -2.8  | -6.1  | -2.3  | -2.9  | -12.3 | -3.3  | -1.7   | 7.5   | 8.7   | 1.6   | 6.2   |
|      | CV%   | 4.7  | 9.3   | 6.7   | 7.2   | 9.1   | 4.4   | 4.3   | 4.7   | 4.8   | 3.3   | 3.3    | 4.0   | 3.5   | 5.6   | 2.3   |
| HQC  | Bias% | -3.2 | -9.6  | -9.0  | -2.3  | -11.6 | -8.0  | -4.7  | -7.9  | -13.3 | -7.6  | -2.2   | 3.7   | 6.9   | -1.6  | 2.3   |
|      | CV%   | 7.2  | 8.6   | 8.8   | 6.9   | 9.0   | 2.4   | 2.4   | 4.8   | 3.7   | 4.9   | 1.3    | 3.1   | 5.0   | 4.7   | 5.4   |
|      |       | STP  |       |       |       |       |       |       |       |       |       |        |       |       |       |       |
|      |       | Day1 | Day2  | Day3  | Day4  | Day5  |       |       |       |       |       |        |       |       |       |       |
| LLOQ | Bias% | 2.4  | 7.9   | -7.5  | -7.4  | 9.8   |       |       |       |       |       |        |       |       |       |       |
|      | CV%   | 2.1  | 5.9   | 17.2  | 12.6  | 12.7  |       |       |       |       |       |        |       |       |       |       |
| LQC  | Bias% | -0.3 | -5.9  | 1.8   | 6.8   | 13.1  |       |       |       |       |       |        |       |       |       |       |
|      | CV%   | 3.0  | 6.8   | 5.4   | 6.4   | 8.1   |       |       |       |       |       |        |       |       |       |       |
| MQC  | Bias% | -4.8 | -0.5  | -4.0  | 0.6   | -3.1  |       |       |       |       |       |        |       |       |       |       |
|      | CV%   | 3.6  | 1.9   | 8.0   | 3.7   | 5.2   |       |       |       |       |       |        |       |       |       |       |
| HQC  | Bias% | -3.9 | -1.7  | -2.3  | -0.6  | -4.1  |       |       |       |       |       |        |       |       |       |       |
|      | CV%   | 2.7  | 2.6   | 6.9   | 2.6   | 4.2   |       |       |       |       |       |        |       |       |       |       |

**Table S3.** Inter-day precision and accuracy of the quantification method in human plasma for the detection of the other detected ASMs. LLOQ = lower limit of quantification, LQC = lower QC, MQC = medium QC, HQC = high QC, CNB = cenobamate, PGB = pregabalin, GBP = gabapentin, LEV = levetiracetam, ETS = ethosuximide, LTG = lamotrigine, PRM = primidone, LCS = lacosamide, ZNS = zonisamide, RUF = rufinamide, MHD = 10-monohydroxy carbazepine, BRV = brivaracetam, CBZ-EP = carbamazepine-epoxide, TPM = topiramate, TGB = tiagabine, PMP = perampanel, STP = stiripentol.

|             |              | <b>PGB</b>    | <b>GBP</b> | <b>LEV</b> | <b>ETS</b> | <b>LTG</b> | <b>PRM</b> | <b>LCS</b> | <b>ZNS</b> | <b>RUF</b> | <b>MHD</b> | <b>BRV</b> |
|-------------|--------------|---------------|------------|------------|------------|------------|------------|------------|------------|------------|------------|------------|
| <b>LLOQ</b> | <b>Bias%</b> | 6.0           | -7.5       | -4.0       | -5.1       | 1.1        | -2.6       | -1.0       | -8.8       | 1.4        | -4.1       | 0.6        |
|             | <b>CV%</b>   | 10.0          | 11.4       | 10.1       | 12.0       | 8.1        | 11.5       | 14.3       | 10.9       | 10.7       | 3.4        | 16.0       |
| <b>LQC</b>  | <b>Bias%</b> | -4.2          | -0.9       | 3.2        | 4.3        | 3.1        | 3.2        | 2.1        | 1.8        | 10.0       | 0.1        | -4.1       |
|             | <b>CV%</b>   | 4.8           | 11.0       | 1.7        | 7.3        | 7.0        | 7.0        | 6.4        | 6.7        | 3.3        | 9.9        | 5.9        |
| <b>MQC</b>  | <b>Bias%</b> | 3.8           | -3.6       | -2.6       | -0.4       | -2.4       | -6.5       | -2.7       | -2.7       | 2.5        | -0.2       | -9.8       |
|             | <b>CV%</b>   | 5.2           | 3.5        | 4.3        | 4.2        | 2.3        | 3.4        | 3.4        | 2.8        | 2.4        | 1.3        | 3.1        |
| <b>HQC</b>  | <b>Bias%</b> | 3.0           | -6.5       | -4.7       | -3.2       | -2.5       | -7.0       | -3.5       | -2.9       | 0.8        | -2.3       | -10.1      |
|             | <b>CV%</b>   | 3.4           | 3.4        | 5.0        | 2.8        | 1.5        | 2.9        | 1.9        | 1.4        | 6.0        | 2.8        | 2.8        |
|             |              | <b>CBZ-EP</b> | <b>TPM</b> | <b>TGB</b> | <b>PMP</b> | <b>STP</b> |            |            |            |            |            |            |
| <b>LLOQ</b> | <b>Bias%</b> | -7.9          | -7.0       | -10.9      | -6.1       | 1.1        |            |            |            |            |            |            |
|             | <b>CV%</b>   | 5.0           | 4.0        | 3.6        | 10.8       | 8.1        |            |            |            |            |            |            |
| <b>LQC</b>  | <b>Bias%</b> | -1.2          | 0.5        | -1.4       | 0.9        | 3.1        |            |            |            |            |            |            |
|             | <b>CV%</b>   | 8.2           | 9.1        | 5.8        | 8.0        | 7.0        |            |            |            |            |            |            |
| <b>MQC</b>  | <b>Bias%</b> | -3.4          | -1.7       | -5.4       | 4.5        | -2.4       |            |            |            |            |            |            |
|             | <b>CV%</b>   | 6.2           | 1.5        | 4.4        | 4.2        | 2.3        |            |            |            |            |            |            |
| <b>HQC</b>  | <b>Bias%</b> | -7.8          | -7.1       | -8.3       | 1.8        | -2.5       |            |            |            |            |            |            |
|             | <b>CV%</b>   | 4.3           | 4.4        | 3.4        | 3.7        | 1.5        |            |            |            |            |            |            |

**Table S4.** Demographic and therapeutic features of patients receiving CNB as co-ASMs in polytherapy at Fondazione IRCCS Istituto Neurologico Carlo Besta. CNB = cenobamate, LEV = levetiracetam, LTG = lamotrigine, PRM = primidone, LCS = lacosamide, ZNS = zonisamide, BRV= brivaracetam, TPM = topiramate, PMP = perampanel, VPA = valproic acid, CBZ = carbamazepine, PB = phenobarbital, PHT = phenytoin.

| Patient    | Age (years) | Gender | CNB dose (mg/day) | CNB dose (mg/kg/day) | Co-therapy              |
|------------|-------------|--------|-------------------|----------------------|-------------------------|
| Patient 1  | 25          | M      | 50                | 0.83                 | VPA, CBZ                |
|            |             |        | 200               | 3.28                 | VPA, CBZ                |
|            |             |        | 250               | 4.17                 | VPA                     |
|            |             |        | 250               | 4.31                 | VPA                     |
|            |             |        | 250               | 4.24                 | VPA                     |
| Patient 2  | 56          | F      | 200               | 3.64                 | PB, TPM                 |
|            |             |        | 350               | 6.36                 | TPM                     |
|            |             |        | 400               | 7.14                 | TPM                     |
|            |             |        | 400               | 7.14                 | TPM                     |
| Patient 3  | 20          | M      | 25                | 0.43                 | BRV, LCS, PMP, clobazam |
|            |             |        | 250               | 4.31                 | BRV, LCS                |
|            |             |        | 275               | 4.82                 | BRV, LCS                |
|            |             |        | 300               | 5.45                 | BRV, LCS                |
| Patient 4  | 59          | F      | 250               | 3.62                 | PB, BRV, LCS            |
|            |             |        | 300               | 4.35                 | PB, BRV, LCS            |
| Patient 5  | 39          | F      | 200               | 4.00                 | CBZ, BRV, clobazam      |
|            |             |        | 200               | 3.85                 | CBZ, BRV                |
| Patient 6  | 57          | F      | 200               | 3.03                 | LEV, PGB, LCS           |
| Patient 7  | 33          | M      | 25                | 0.29                 | LTG, LCS                |
|            |             |        | 150               | 1.76                 | LTG, LCS                |
| Patient 8  | 37          | M      | 50                | 0.71                 | VPA, PB, LCS            |
|            |             |        | 150               | 2.08                 | VPA, PB, LCS            |
| Patient 9  | 39          | F      | 12.5              | 0.11                 | PB, LEV, PMP            |
|            |             |        | 150               | 1.19                 | PB, LEV, PMP            |
| Patient 10 | 27          | M      | 100               | 1.56                 | PHT, PB, PRM            |
| Patient 11 | 75          | F      | 25                | 0.56                 | CBZ, ZNS                |
| Patient 12 | 46          | M      | 200               | 2.86                 | BRV, TPM                |
| Patient 13 | 62          | M      | 150               | 1.69                 | LEV, LCS                |
| Patient 14 | 30          | M      | 200               | 3.08                 | BRV, LTG                |

**Table S5.** MS method transitions (in bold **quantifier ion**, in italic *qualifier ion*), parameters and retention times. Compounds are listed in order of retention time apart from CNB. CNB = cenobamate, PGB = pregabalin, GBP = gabapentin, LEV = levetiracetam, ETS = ethosuximide, LTG = lamotrigine, PRM = primidone, LCS = lacosamide, ZNS = zonisamide, RUF = rufinamide, MHD = 10-monohydroxy carbazepine, BRV = brivaracetam, CBZ-EP = carbamazepine-epoxide, TPM = topiramate, TGB = tiagabine, PMP = perampanel, STP = stiripentol.

| Compound                | Precursor ion (m/z) | Cone (V) | Product ion (m/z)              | Collision (V) | Ion mode | Retention time (min) | Internal standard                 |
|-------------------------|---------------------|----------|--------------------------------|---------------|----------|----------------------|-----------------------------------|
| CNB                     | 268.02              | 20       | <b>154.99</b><br><i>197.99</i> | 14<br>10      | +        | 3.32                 | Lamotrigine-<br>13C3,d3           |
| PGB                     | 160.00              | 34       | <b>142.00</b><br><i>83.00</i>  | 10<br>14      | +        | 1.00                 | Pregabalin-d4                     |
| GBP                     | 172.00              | 38       | <b>154.00</b><br><i>137.00</i> | 11<br>16      | +        | 1.01                 | Pregabalin-d4                     |
| LEV                     | 171.00              | 22       | <b>126.10</b><br><i>154.00</i> | 14<br>7       | +        | 1.08                 | Levetiracetam-d6                  |
| ETS                     | 139.90              | 45       | <b>140.00</b><br><i>41.90</i>  | 5<br>20       | -        | 1.45                 | Ethosuximide-d3                   |
| LTG                     | 256.10              | 55       | <b>211.10</b><br><i>158.90</i> | 24<br>30      | +        | 1.82                 | Lamotrigine-<br>13C3,d3           |
| PRM                     | 219.00              | 25       | <b>162.20</b><br><i>90.90</i>  | 12<br>25      | +        | 1.97                 | Primidone-d5                      |
| LCS                     | 251.10              | 20       | <b>91.20</b><br><i>108.00</i>  | 25<br>8       | +        | 2.13                 | Lacosamide-d3                     |
| ZNS                     | 210.90              | 25       | <b>118.90</b><br><i>147.00</i> | 15<br>10      | -        | 2.16                 | Zonisamide-d4                     |
| RUF                     | 239.00              | 32       | <b>126.90</b><br><i>100.90</i> | 25<br>8       | +        | 2.39                 | Lacosamide-d3                     |
| MHD                     | 255.10              | 20       | <b>237.20</b><br><i>194.00</i> | 7<br>20       | +        | 2.63                 | 10-monohydroxy<br>carbazepine-d10 |
| BRV                     | 213.10              | 25       | <b>168.20</b><br><i>55.00</i>  | 17<br>35      | +        | 2.82                 | Levetiracetam-d6                  |
| CBZ-EP                  | 253.00              | 27       | <b>210.00</b><br><i>180.00</i> | 15<br>15      | +        | 3.13                 | Oxcarbazepine-d4                  |
| TPM                     | 337.97              | 48       | <b>337.97</b><br><i>77.85</i>  | 3<br>32       | -        | 3.33                 | Topiramate-d12                    |
| TGB                     | 376.00              | 45       | <b>247.00</b><br><i>110.90</i> | 45<br>45      | +        | 3.56                 | Tiagabine-d5                      |
| PMP                     | 350.00              | 72       | <b>219.10</b><br><i>247.00</i> | 36<br>28      | +        | 3.98                 | Tiagabine-d5                      |
| STP                     | 217.20              | 35       | <b>187.00</b><br><i>145.00</i> | 15<br>15      | +        | 4.22                 | Stiripentol-d9                    |
| Pregabalin-d4           | 164.10              | 34       | <b>146.10</b>                  | 10            | +        | 0.99                 |                                   |
| Levetiracetam-d6        | 177.00              | 22       | <b>132.10</b>                  | 14            | +        | 1.08                 |                                   |
| Ethosuximide-d3         | 142.90              | 45       | <b>143.00</b>                  | 5             | -        | 1.44                 |                                   |
| Lamotrigine-<br>13C3,d3 | 262.10              | 55       | <b>217.10</b>                  | 24            | +        | 1.82                 |                                   |
| Primidone-d5            | 224.00              | 25       | <b>167.00</b>                  | 12            | +        | 1.94                 |                                   |
| Lacosamide-d3           | 254.20              | 20       | <b>108.00</b>                  | 10            | +        | 2.10                 |                                   |
| Zonisamide-d4           | 214.90              | 25       | <b>122.90</b>                  | 15            | -        | 2.12                 |                                   |

|                                     |        |    |               |    |   |      |
|-------------------------------------|--------|----|---------------|----|---|------|
| 10-monohydroxy<br>carbamazepine-d10 | 258.10 | 20 | <b>240.20</b> | 7  | + | 2.62 |
| Oxcarbazepine-<br>d4                | 257.00 | 30 | <b>240.00</b> | 12 | + | 3.33 |
| Topiramate-d12                      | 350.03 | 54 | <b>350.03</b> | 3  | - | 3.29 |
| Tiagabine-d5                        | 382.00 | 45 | <b>253.00</b> | 20 | + | 3.56 |
| Stiripentol-d9                      | 226.00 | 35 | <b>196.00</b> | 15 | + | 4.21 |
